# Supplementary material for: Utility of family history in disease prediction in the era of polygenic scores
Source: bioRxiv or medRxiv preprint supplement (doi:10.1101/2021.06.25.21259158), 2021-06-28
Supplement: Supplementary file [file media-1.pdf]

## Supplementary Figures and Tables

### CAD in HUNT sensitivity analysis

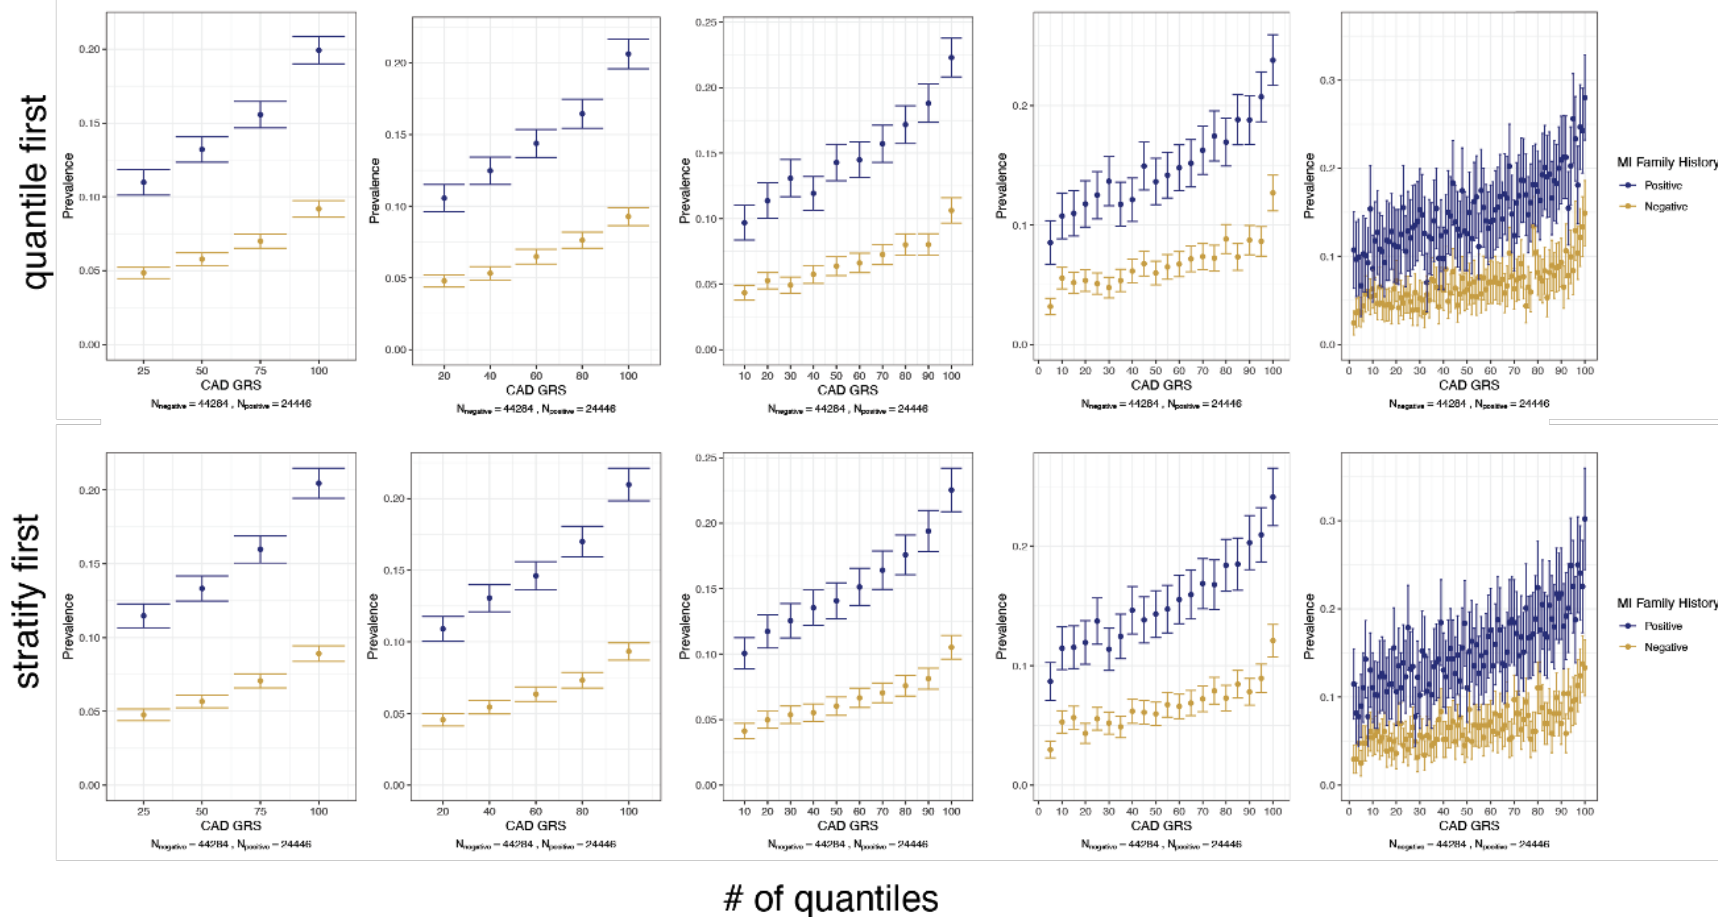

**Supplementary Figure 1 Sensitivity analysis for disease prevalence**

Regardless of the number of quantiles ( $n=4,5,10,20,100$ ) or if quantiles are calculated before (quantile first) or after (stratify first) stratification by family history, the trends remain.

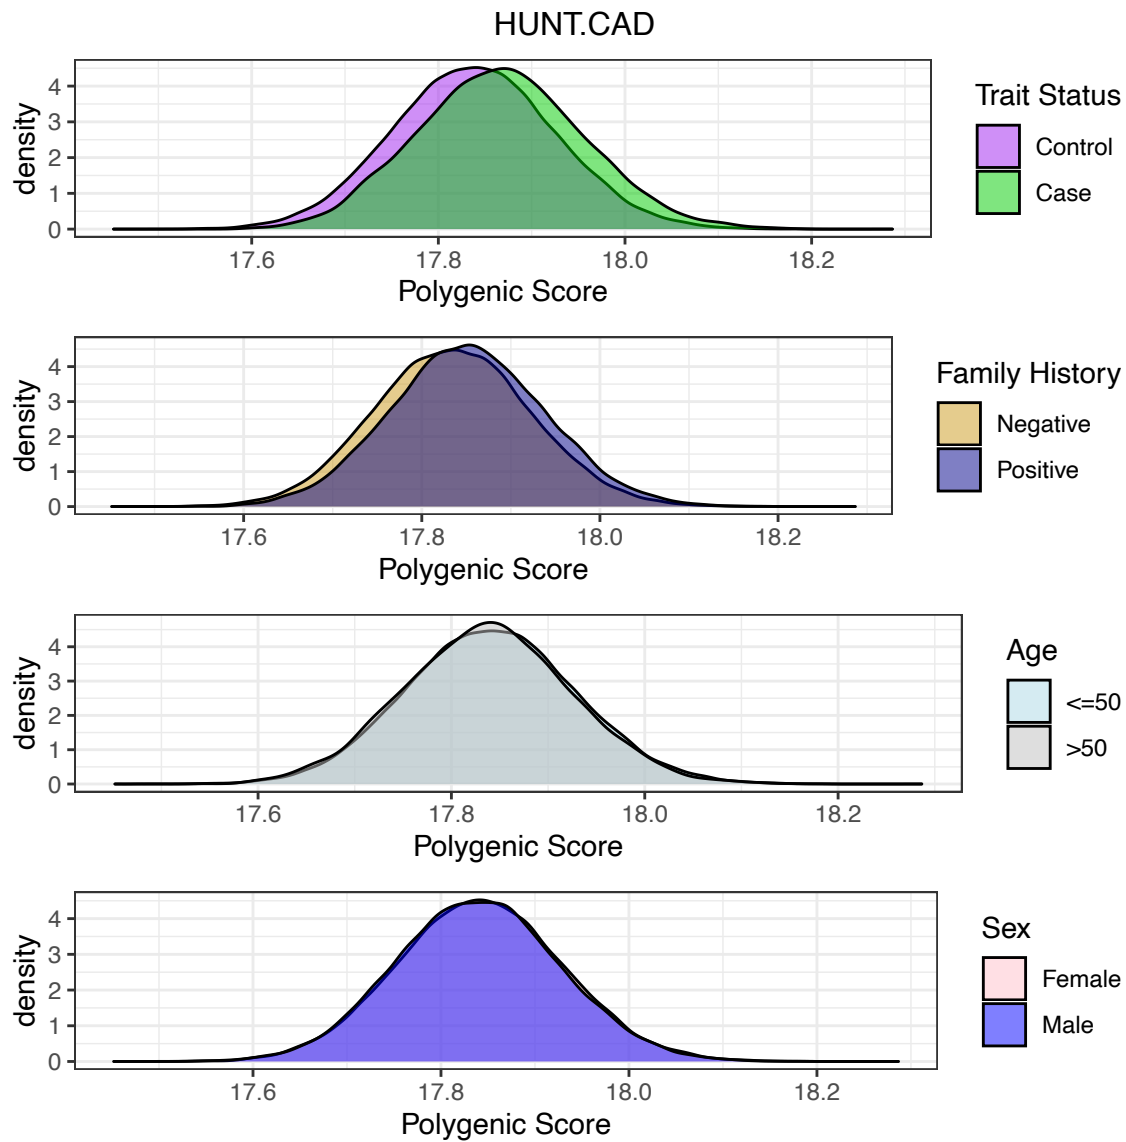

**Supplementary Figure 2 Distribution of PGS for CAD in HUNT**

Inverse normalized polygenic score stratified by trait status, family history, 50 years of age, and sex.

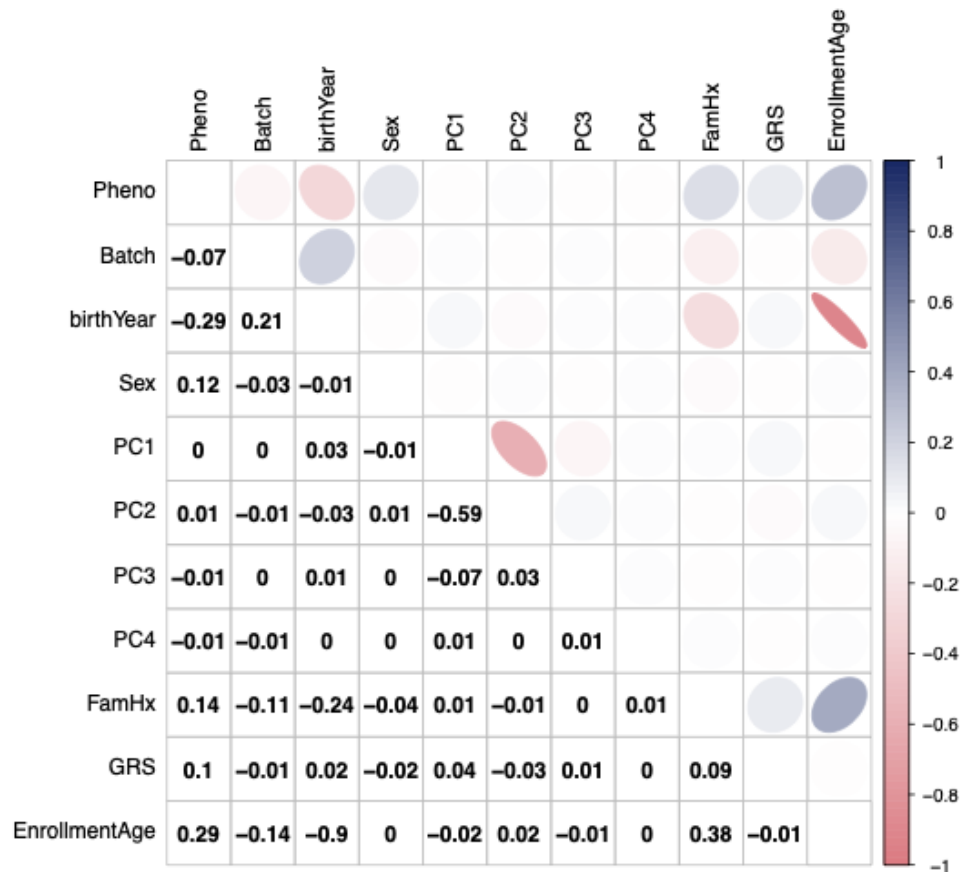

**Supplementary Figure 3 Pearson correlations between model variables for CAD in HUNT.** Pheno is the phenotype (e.g., CAD). Batch is genotyping batch coded 0,1. FamHx is family history coded 0,1. Sex is coded 0= females and 1= males. Enrollment age is the age at which a participant filled out the self-report family history variables in a HUNT survey.

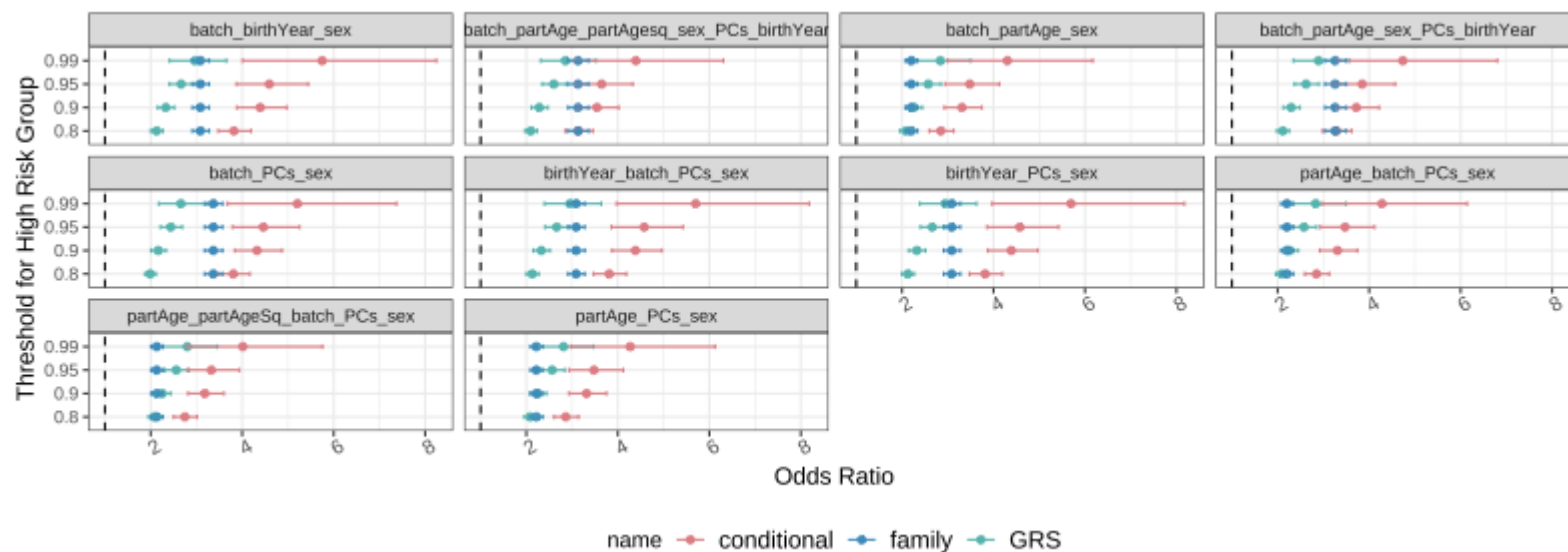

**Supplementary Figure 4 Model selection for CAD**

An indicator variable was used to identify a “high risk” group. Conditional is top X% of distribution with positive family history. Model selection was performed, leaving out one covariate at a time. Batch is genotyping batch, participation age is the age family history was self reported, partAgesq is participation age squared. All continuous variables were scaled to mean of 0 and variance of 1. PGS was inverse normalized. When birthyear and participation age are not included, family history has a higher odds ratio than when these covariates are adjusted for

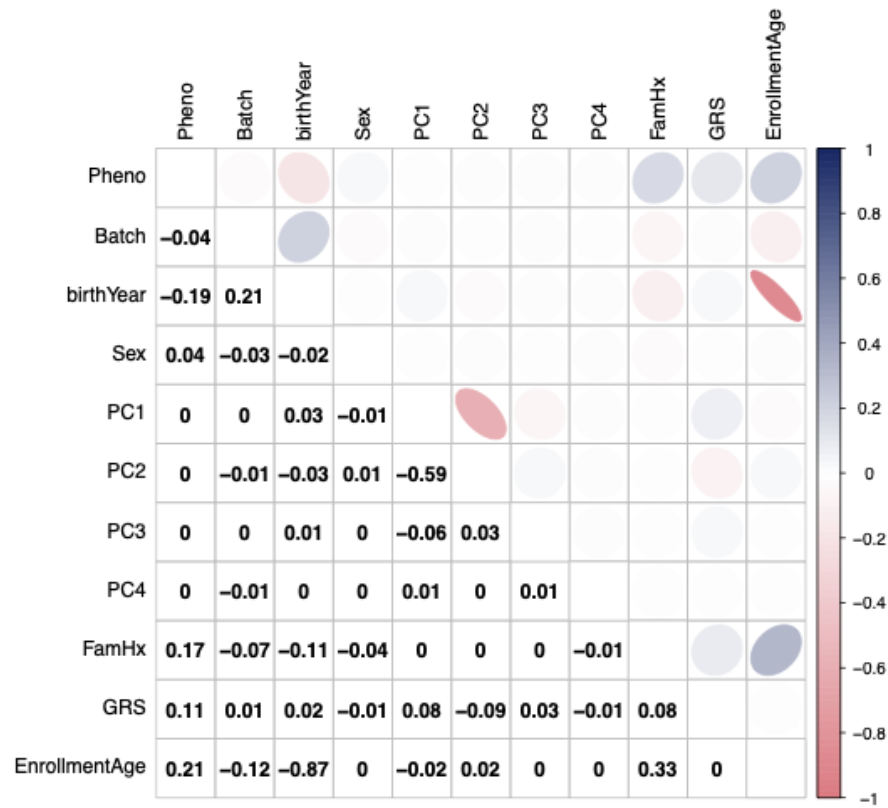

**Supplementary Figure 5 Pearson correlations between model variables for T2D in HUNT.**

Pheno is the phenotype (e.g., Type 2 diabetes). Batch is genotyping batch coded 0,1. FamHx is family history coded 0,1. Sex is coded 0= females and 1= males. Enrollment age is the age at which a participant filled out the self-report family history variables in a HUNT survey.

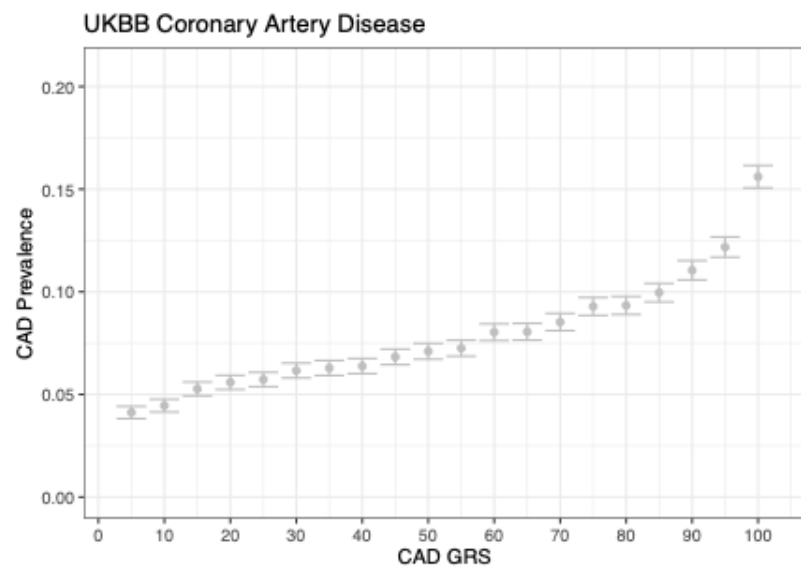

N = 408577

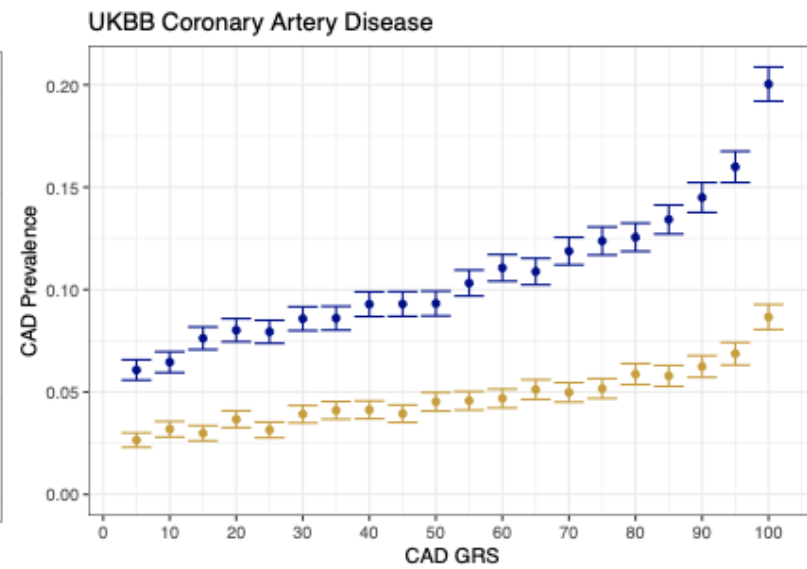

Heart Disease FamHx — Positive — Negative

$N_{\text{negative}} = 161364$ ,  $N_{\text{positive}} = 178088$

Supplementary Figure 6 CAD prevalence in UK Biobank by PGS ventiles and family history strata

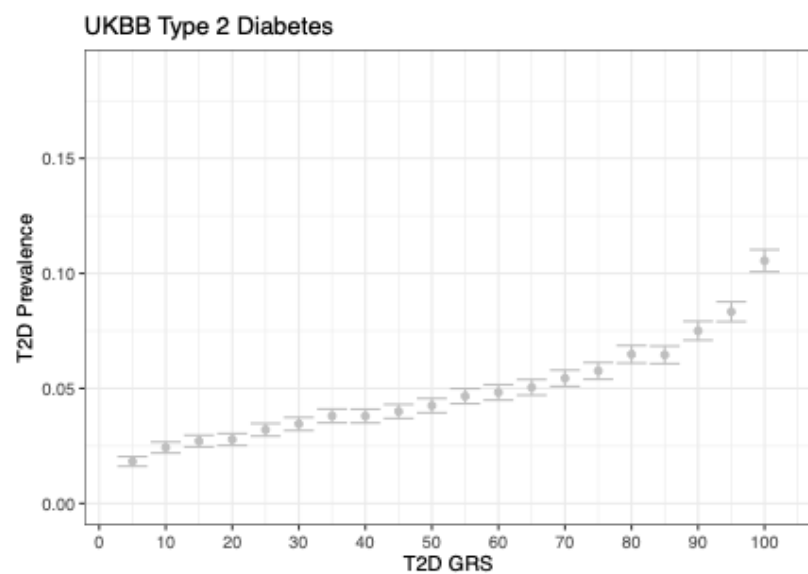

N = 408577

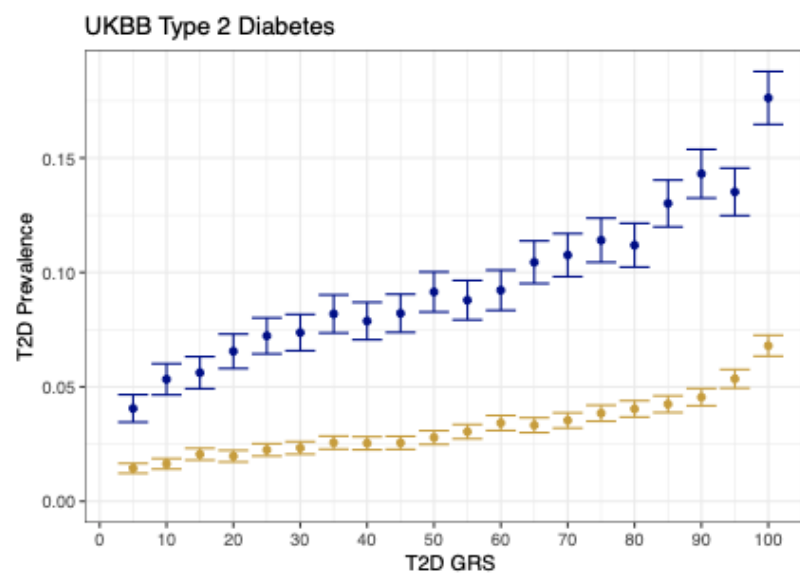

Diabetes FamHx Positive Negative

$N_{\text{negative}} = 233270$  ,  $N_{\text{positive}} = 83287$

Supplementary Figure 7 T2D prevalence in UK Biobank by PGS ventiles and family history strata

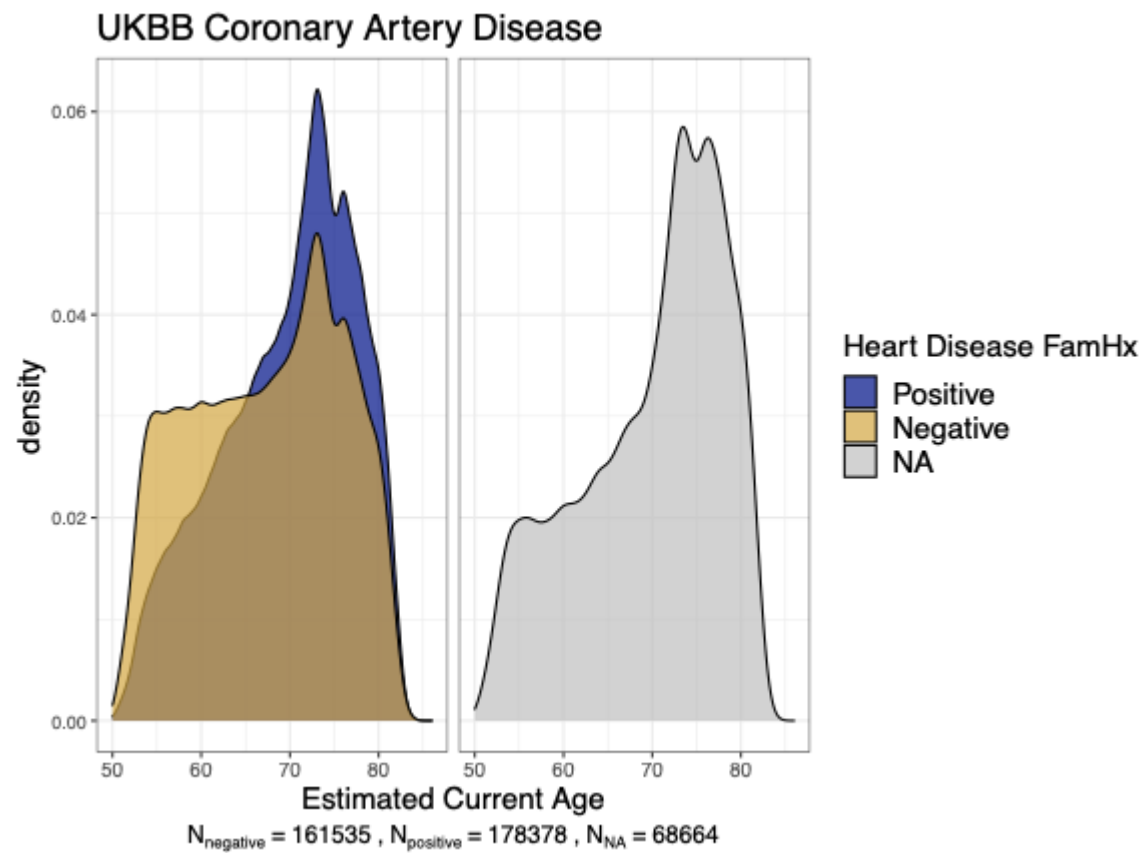

**Supplementary Figure 8 Age distribution in UK Biobank.** With recent enrollment and only one time point, we are using current age to estimate the age of self-reported family history of heart disease in UK Biobank.



**Supplementary Table 1 Clinical impact of high risk stratification for T2D in HUNT.**

| Predictor                      | High Risk definition   | Reference Group | Odds Ratio | 95% CI    | p-value                 | % of sample in High Risk | Median participation age in High Risk | Prevalence in High Risk | Prevalence in Reference Group | Sensitivity | Specificity |
|--------------------------------|------------------------|-----------------|------------|-----------|-------------------------|--------------------------|---------------------------------------|-------------------------|-------------------------------|-------------|-------------|
| PGS                            | Top 20%                | Remaining 80%   | 2.09       | 1.97-2.24 | $4.15 \times 10^{-113}$ | 20                       | 40.7                                  | 0.123                   | 0.066                         | 0.32        | 0.81        |
|                                | Top 10%                | Remaining 90%   | 2.82       | 2.11-2.47 | $7.83 \times 10^{-93}$  | 10                       | 40.8                                  | 0.119                   | 0.071                         | 0.18        | 0.91        |
|                                | Top 5%                 | Remaining 95%   | 2.35       | 2.35-2.88 | $3.02 \times 10^{-75}$  | 5                        | 41.0                                  | 0.116                   | 0.073                         | 0.10        | 0.95        |
|                                | Top 1%                 | Remaining 99%   | 2.85       | 2.31-3.52 | $1.67 \times 10^{-22}$  | 1                        | 40.9                                  | 0.109                   | 0.077                         | 0.02        | 0.99        |
| FH                             | Positive               | Negative        | 3.12       | 2.91-3.36 | $2.44 \times 10^{-212}$ | 22.9                     | 52.6                                  | 0.159                   | 0.053                         | 0.47        | 0.79        |
| PGS conditional on Positive FH | Top 20% of Positive FH | Remaining 80%   | 3.14       | 2.85-3.46 | $6.21 \times 10^{-119}$ | 4.6                      | 51.5                                  | 0.223                   | 0.071                         | 0.13        | 0.96        |
|                                | Top 10% of Positive FH | Remaining 90%   | 3.54       | 3.13-4.02 | $6.90 \times 10^{-87}$  | 2.3                      | 51.2                                  | 0.253                   | 0.074                         | 0.07        | 0.98        |
|                                | Top 5% of Positive FH  | Remaining 95%   | 3.65       | 3.07-4.32 | $6.83 \times 10^{-50}$  | 1.1                      | 51.1                                  | 0.265                   | 0.075                         | 0.04        | 0.99        |
|                                | Top 1% of Positive FH  | Remaining 99%   | 4.39       | 3.06-6.31 | $1.07 \times 10^{-15}$  | 0.23                     | 51.0                                  | 0.299                   | 0.077                         | 0.01        | 0.99        |

An indicator variable was created for the various high risk definitions above. The model controlled for batch, participation age, participation age squared, birth year, principal components 1-4 from genetic data, and sex.

**Supplementary Table 2 Full model estimates for T2D in both cohorts.**

|                                         | <b>HUNT</b> |               |                         | <b>UKB</b> |               |                          |
|-----------------------------------------|-------------|---------------|-------------------------|------------|---------------|--------------------------|
| <b>Predictor</b>                        | <b>OR</b>   | <b>95% CI</b> | <b>p-value</b>          | <b>OR</b>  | <b>95% CI</b> | <b>p-value</b>           |
| Standardized Participation Age          | 2.22        | 1.76-2.74     | $2.61 \times 10^{-13}$  | 0.70       | 0.53-0.93     | 0.014                    |
| Standardized Participation Age Squared  | 0.46        | 0.39-0.56     | $2.54 \times 10^{-16}$  | 0.86       | 0.66-1.11     | 0.235                    |
| Standardized 2021-birthYear             | 2.22        | 2.06-2.40     | $1.80 \times 10^{-97}$  | 2.83       | 2.64-3.03     | $3.72 \times 10^{-192}$  |
| Male Sex                                | 1.41        | 1.33-1.50     | $2.18 \times 10^{-30}$  | 1.96       | 1.90-2.03     | $< 2.2 \times 10^{-308}$ |
| Positive Family History                 | 3.01        | 2.79-3.24     | $5.58 \times 10^{-181}$ | 3.01       | 2.90-3.11     | $< 2.2 \times 10^{-308}$ |
| Inverse normalized PGS                  | 1.60        | 1.54-1.67     | $9.65 \times 10^{-115}$ | 1.52       | 1.49-1.56     | $1.56 \times 10^{-265}$  |
| Family History x Inverse normalized PGS | 0.913       | 0.86-0.97     | 0.0032                  | 0.99       | 0.95-1.02     | 0.42                     |

Adjusted for principal components 1-4 from genetic data and genotyping batch (HUNT)/genotyping array (UKB).

**Supplementary Table 3 Model comparisons for T2D in HUNT**

| <b>Model 1</b>                  | <b>Model 2</b>                                   | <b>LRT p-value</b>      | <b>Nagelkerke's <math>r^2</math></b> |
|---------------------------------|--------------------------------------------------|-------------------------|--------------------------------------|
| Base                            | PGS model                                        | $2.55 \times 10^{-202}$ | 0.031                                |
| Base                            | FH model                                         | $5.95 \times 10^{-214}$ | 0.033                                |
| PGS model                       | PGS + FH<br>(additive)<br>model                  | $6.84 \times 10^{-185}$ | 0.028                                |
| FH model                        | PGS + FH<br>(additive)<br>model                  | $2.94 \times 10^{-173}$ | 0.026                                |
| PGS + FH<br>(additive)<br>model | PGS + FH +<br>PGS x FH<br>(interaction)<br>model | 0.003                   | 0.00029                              |

**Supplementary Table 4 Full model estimates for CAD in UKB**

| <b>Predictor</b>                                           | <b>OR</b> | <b>95% CI</b> | <b>p-value</b>           |
|------------------------------------------------------------|-----------|---------------|--------------------------|
| Standardized Participation Age                             | 1.35      | 1.054-1.74    | 0.0179                   |
| Standardized Participation Age Squared                     | 0.54      | 0.43-0.67     | $3.6 \times 10^{-8}$     |
| Standardized 2021-birthYear                                | 3.02      | 2.87-3.19     | $< 2.2 \times 10^{-308}$ |
| Male Sex                                                   | 2.87      | 2.79-2.95     | $< 2.2 \times 10^{-308}$ |
| Positive Family History                                    | 2.03      | 1.98-2.1      | $< 2.2 \times 10^{-308}$ |
| Inverse normalized PGS                                     | 1.41      | 1.38-1.44     | $1.29 \times 10^{-169}$  |
| Family History x Inverse normalized PGS (interaction term) | 1.03      | 1.01-1.07     | 0.0134                   |

Adjusted for principal components 1-4 from genetic data and genotyping array.

**Supplementary Table 5 Model comparisons for CAD and T2D in UKB**

|                           |                                         | CAD                      |                    | T2D                      |                      |
|---------------------------|-----------------------------------------|--------------------------|--------------------|--------------------------|----------------------|
| Model 1                   | Model 2                                 | LRT p-value              | Nagelkerke's $r^2$ | LRT p-value              | Nagelkerke's $r^2$   |
| Base                      | PGSmodel                                | $< 2.2 \times 10^{-308}$ | 0.0234             | $< 2.2 \times 10^{-308}$ | 0.296                |
| Base                      | FH model                                | $< 2.2 \times 10^{-308}$ | 0.0207             | $< 2.2 \times 10^{-308}$ | 0.046                |
| PGS model                 | PGS + FH (additive) model               | $< 2.2 \times 10^{-308}$ | 0.0168             | $< 2.2 \times 10^{-308}$ | 0.0378               |
| FH model                  | PGS + FH (additive) model               | $< 2.2 \times 10^{-308}$ | 0.0195             | $< 2.2 \times 10^{-308}$ | 0.0218               |
| PGS + FH (additive) model | PGS + FH + PGS x FH (interaction) model | 0.014                    | 0.00004            | 0.416                    | $6.2 \times 10^{-6}$ |

**Supplementary Table 6. Cohort demographics**

|                                                         | <b>HUNT Study (N=69,635)</b> | <b>UK Biobank (N=408,577)</b> |
|---------------------------------------------------------|------------------------------|-------------------------------|
| Median participation age range for family history (IQR) | 41.4 (30.4,54.9)             | 59 (51,64)                    |
| Median birth year (IQR)                                 | 1951 (1937,1964)             | 1950 (1945,1957)              |
| Female (%)                                              | 53                           | 54                            |
| T2D prevalence (%)                                      | 7.8                          | 4.9                           |
| CAD prevalence (%)                                      | 9.7                          | 7.8                           |
| MI prevalence (%)                                       | 9.0                          | NA                            |

**Supplementary Table 7 Phenotype definitions for main outcomes and family history variables in HUNT and UKB**

|                                     | <b>HUNT</b>                                                                                                                                                                                                                                                |                                                                                                                                                                                                                    | <b>UKB</b>                                  |                                        |
|-------------------------------------|------------------------------------------------------------------------------------------------------------------------------------------------------------------------------------------------------------------------------------------------------------|--------------------------------------------------------------------------------------------------------------------------------------------------------------------------------------------------------------------|---------------------------------------------|----------------------------------------|
|                                     | <b>CAD</b>                                                                                                                                                                                                                                                 | <b>T2D</b>                                                                                                                                                                                                         | <b>CAD</b>                                  | <b>T2D</b>                             |
| <b>Case definition</b>              | Self reported CABG or PCI or MI<br>ICD code (I21,I25.2,410,412)                                                                                                                                                                                            | Non fasting serum glucose > 11.1, HbA1C > 6.5 or E11, 250.00, 250.02, 250.10, 250.12, 250.20, 250.2, 250.30, 250.32, 250.40, 250.42, 250.50, 250.52, 250.60, 250.62, 250.70, 250.72, 250.80, 250.82, 250.90, 250.9 | Phecode 411 for ischemic heart disease      | Phecode 250.2 for Type 2 diabetes      |
| <b>Self-reported family history</b> | HUNT1: Sibling with heart attack or angina pectoris<br>HUNT2: Parents or siblings had an MI or chest pain AND Mother, Father, Sister, Brother, Child had heart attack before age 60<br>HUNT3: Parents, siblings or children had heart attack before age 60 | HUNT1: Siblings with diabetes<br>HUNT2: Mother, father, brother, sister, child with diabetes<br>HUNT3: Parents, siblings or children with diabetes                                                                 | Heart disease of mother, father, or sibling | Diabetes of mother, father, or sibling |

**Supplementary Table 8 Sample sizes.**

|          | <b>Self-reported family history</b> | <b>Control</b> | <b>Case</b> | <b>Total</b> |
|----------|-------------------------------------|----------------|-------------|--------------|
| HUNT CAD | Negative                            | 41,361         | 2,923       | 44,284       |
|          | Positive                            | 20,705         | 3,741       | 24,446       |
|          | Unknown/NA                          | 827            | 78          | 905          |
| HUNT T2D | Negative                            | 48,886         | 2,760       | 51,646       |
|          | Positive                            | 12,926         | 2,445       | 15,371       |
|          | Unknown/NA                          | 2,441          | 177         | 2,618        |
| UKBB CAD | Positive                            | 159,012        | 19,076      | 178,088      |
|          | Negative                            | 153,762        | 7,602       | 161,364      |
|          | NA                                  | 63,143         | 5,387       | 68,530       |
| UKBB T2D | Negative                            | 225,772        | 7,498       | 233,270      |
|          | Positive                            | 57,380         | 7,907       | 65,287       |
|          | Unknown/NA                          | 87,217         | 4,790       | 92,007       |

The number of cases and controls and self-reported positive/negative family history participants in UKB and HUNT for both CAD and T2D.
